# Supplementary material for: Prevalence and Antibiotic Resistance in Campylobacter spp. Isolated from Humans and Food-Producing Animals in West Africa: A Systematic Review and Meta-Analysis
Source: MDPI journal article supplement (doi:10.3390/pathogens11020140), 2022-01-24
Supplement: s1 [file s1]

**Prevalence and antibiotic resistance profiles of *Campylobacter* spp. isolated from humans and animals in West Africa: a systematic review and meta-analysis**

---

**Search Strategy**

---

**Conducted on 31 July 2021**

**Database: Medline**

| #  | Searches                                                                                                                                                                                                                                                                                                                                                                                     | Results |
|----|----------------------------------------------------------------------------------------------------------------------------------------------------------------------------------------------------------------------------------------------------------------------------------------------------------------------------------------------------------------------------------------------|---------|
| #1 | Campylobacteriosis[Mesh] OR Campylobacter[Mesh] OR campylob*[tw]                                                                                                                                                                                                                                                                                                                             | 19,249  |
| #2 | West Africa[Mesh] OR Benin[tw] OR Burkina Faso[tw] OR Cape Verde[tw] OR Côte d'Ivoire[tw] OR Gambia[tw] OR Ghana[tw] OR (Guinea[tw] NOT guinea pig*[tw]) OR Guinea-Bissau[tw] OR Liberia[tw] OR Mali[tw] OR Mauritania[tw] OR Niger[tw] OR Nigeria[tw] OR Saint Helena[tw] OR Senegal[tw] OR Sierra Leone[tw] OR Togo[tw] OR Western Africa*[tw] OR West Africa*[tw] AND "English"[language] | 104,295 |
| #3 | #1 AND #2                                                                                                                                                                                                                                                                                                                                                                                    | 145     |

\* instruct the database to search for variations in spelling and variant endings of the root word "campylob".

**Database: Directory of Open Access Journals (DOAJ)**

| #  | Searches                                | Results |
|----|-----------------------------------------|---------|
| 1  | Campylobact* AND Benin                  | 4       |
| 2  | Campylobact* AND Burkina Faso           | 1       |
| 3  | Campylobact* AND Cape Verde             | 0       |
| 4  | Campylobact* AND Côte d'Ivoire          | 1       |
| 5  | Campylobact* AND Gambia                 | 3       |
| 6  | Campylobact* AND Ghana                  | 9       |
| 7  | Campylobact* AND Guinea NOT guinea pig* | 0       |
| 8  | Campylobact* AND Guinea-Bissau          | 1       |
| 9  | Campylobact* AND Liberia                | 0       |
| 10 | Campylobact* AND Mali                   | 1       |
| 11 | Campylobact* AND Mauritania             | 0       |
| 12 | Campylobact* AND Niger                  | 3       |
| 13 | Campylobact* AND Nigeria                | 15      |
| 14 | Campylobact* AND Saint Helena           | 0       |

|    |                                 |           |
|----|---------------------------------|-----------|
| 15 | Campylobact* AND Senegal        | 4         |
| 16 | Campylobact* AND B Sierra Leone | 0         |
| 17 | Campylobact* AND Togo           | 1         |
| 18 | Campylobact* AND Western Africa | 4         |
| 19 | Campylobact* AND West Africa    | 10        |
|    | <b>Total</b>                    | <b>57</b> |

\*instruct the database to search for variations in spelling and variant endings of root words”.

#### Database: Google Scholar

| No | Searches                                                              | Results    |
|----|-----------------------------------------------------------------------|------------|
| 1  | allintitle: Campylobacter OR campylobacteriosis AND Benin             | 2          |
| 2  | allintitle: Campylobacter OR campylobacteriosis AND Burkina Faso      | 6          |
| 3  | allintitle: Campylobacter OR campylobacteriosis AND Cape Verde        | 0          |
| 4  | allintitle: Campylobacter OR campylobacteriosis AND Côte d'Ivoire     | 4          |
| 5  | allintitle: Campylobacter OR campylobacteriosis AND Gambia            | 1          |
| 6  | allintitle: Campylobacter OR campylobacteriosis AND Ghana             | 6          |
| 7  | allintitle: Guinea Campylobacter OR Campylobacteriosis - "guinea pig" | 7          |
| 8  | allintitle: Campylobacter OR campylobacteriosis AND Guinea-Bissau     | 0          |
| 9  | allintitle: Campylobacter OR campylobacteriosis AND Liberia           | 0          |
| 10 | allintitle: Campylobacter OR campylobacteriosis AND Mali              | 0          |
| 11 | allintitle: Campylobacter OR campylobacteriosis AND Mauritania        | 0          |
| 12 | allintitle: Campylobacter OR campylobacteriosis AND Niger             | 0          |
| 13 | allintitle: Campylobacter OR campylobacteriosis AND Nigeria           | 71         |
| 14 | allintitle: Campylobacter OR campylobacteriosis AND Saint Helena      | 0          |
| 15 | allintitle: Campylobacter OR campylobacteriosis AND Senegal           | 13         |
| 16 | allintitle: Campylobacter OR campylobacteriosis AND Sierra Leone      | 0          |
| 17 | allintitle: Campylobacter OR campylobacteriosis AND Togo              | 0          |
| 18 | allintitle: Campylobacter OR campylobacteriosis AND Western Africa    | 0          |
| 19 | allintitle: Campylobacter OR campylobacteriosis AND West Africa       | 5          |
|    | <b>Total</b>                                                          | <b>128</b> |

**Database: African Index Medicus**

| # | Searches                      | Results |
|---|-------------------------------|---------|
| 1 | Campylobacter                 | 44      |
| 2 | Campylobacteriosis            | 3       |
| 3 | 1 and 2 (Restrict to English) | 34      |

**Database: African Journals Online (AJOL)**

| # | Searches  | Results |
|---|-----------|---------|
| 1 | campylob* | 427     |

\*instruct the database to search for variations in spelling and variant endings of the root word “campylob”.
